# Supplementary material for: MOF-based sensors for the detection of airborne α-pinene
Source: Royal Society of Chemistry journal article supplement (doi:10.1039/d4lf00027g), 2024-01-01
Supplement: d4lf00027g1.pdf [file d4lf00027g1.pdf]

## Supporting Information

### MOF-based sensors for the detection of airborne $\alpha$ -pinene

P. Pires Conti,<sup>a,b</sup> P. Iacomì,<sup>a,c</sup> P. F. Brântuas,<sup>a</sup> M. Nicolas,<sup>b</sup> R. Anton,<sup>b</sup> S. Moularat,<sup>b</sup> S. Dasgupta,<sup>d</sup> N. Steunou,<sup>d</sup> G. Maurin,<sup>a</sup> and S. Devautour-Vinot<sup>a</sup>

<sup>a</sup>Institut Charles Gerhardt Montpellier (ICGM), UMR 5253 – CNRS/UM/ENSCM, Pole Chimie Balard Recherche, 34293 Montpellier, France

<sup>b</sup>Centre Scientifique et Technique du Bâtiment (CSTB), 34293 Montpellier, France

<sup>c</sup>Surface Measurement Systems (SMS), Unit 5, Wharfside, London HAO 4PE, UK

<sup>d</sup>Institut Lavoisier de Versailles (ILV), UMR 8180, Université de Versailles St Quentin en Yvelines, Université Paris Saclay, 78035 Versailles cedex, France

### Table of Contents

|          |                                                                                  |           |
|----------|----------------------------------------------------------------------------------|-----------|
| <b>1</b> | <b>Calibration of DVS .....</b>                                                  | <b>2</b>  |
| <b>2</b> | <b>Characterization of the powdered DUT-4(Al) and MIL-100(Fe) .....</b>          | <b>3</b>  |
| 2.1      | DUT-4(Al) .....                                                                  | 3         |
| 2.2      | MIL-100(Fe) .....                                                                | 4         |
| <b>3</b> | <b>Characterization of DUT-4(Al) and MIL-100(Fe) ethanolic suspensions .....</b> | <b>7</b>  |
| <b>4</b> | <b>Characterization of MOF@QCM .....</b>                                         | <b>8</b>  |
| 4.1      | DUT-4(Al)@QCM .....                                                              | 8         |
| 4.2      | MIL-100(Fe)@QCM .....                                                            | 9         |
| <b>5</b> | <b>DUT-4(Al)@QCM and MIL-100(Fe)@QCM sensor response .....</b>                   | <b>10</b> |
| 5.1      | Repeatability .....                                                              | 10        |
| 5.2      | Recovery time .....                                                              | 10        |
| 5.3      | Sensitivity .....                                                                | 11        |
| <b>6</b> | <b>Characterization of DUT-4(Al)/MIL-100(Fe)@QCM .....</b>                       | <b>12</b> |
| <b>7</b> | <b>DUT-4(Al)/MIL-100(Fe)@QCM repeatability .....</b>                             | <b>13</b> |

## 1 Calibration of DVS

A calibration procedure was applied in order to evaluate the partial pressure of  $\alpha$ -pinene in the carrier gas when using the bubbler configuration. Two sorption isotherms, considering pure vapor of  $\alpha$ -pinene and  $\alpha$ -pinene/Argon mixture configurations, were collected on a reference material displaying a condensation-like adsorption behavior, *i.e.*, PCN-777 (cf Figure S1). Both isotherms were adjusted until overlapping by a scaling factor (0.35). The  $\alpha$ -pinene partial pressure in the  $\alpha$ -pinene/Argon mixture corresponds to 281 Pa at 303 K *versus* 803 Pa in the pure phase.

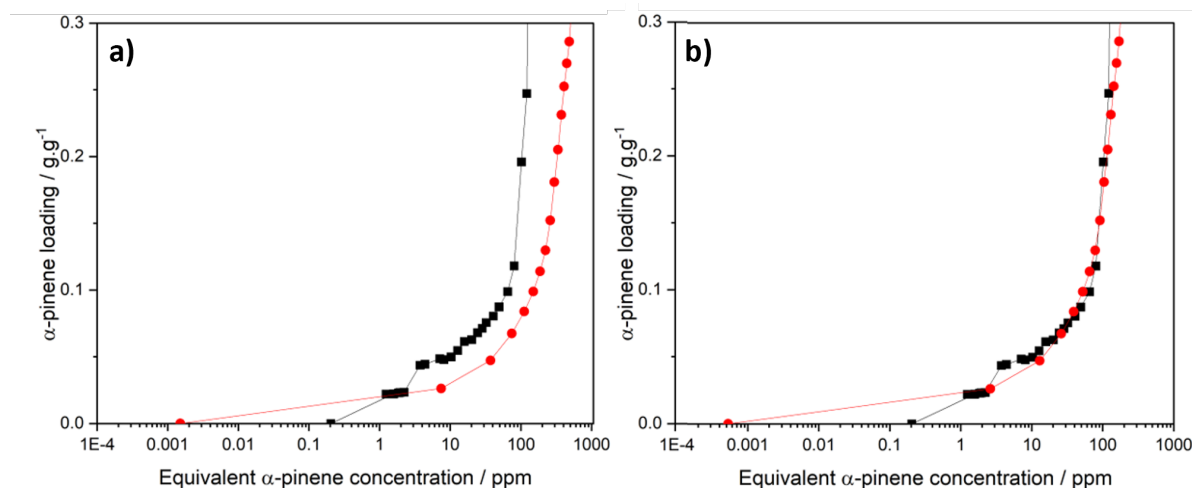

**Figure S1**  $\alpha$ -pinene adsorption isotherms recorded at 303 K for PCN-777, using the pure vapor (black squares) and  $\alpha$ -pinene/Argon mixture (red circles) configurations **a)** before and **b)** after adjustment.

## 2 Characterization of the powdered DUT-4(Al) and MIL-100(Fe)

### 2.1 DUT-4(Al)

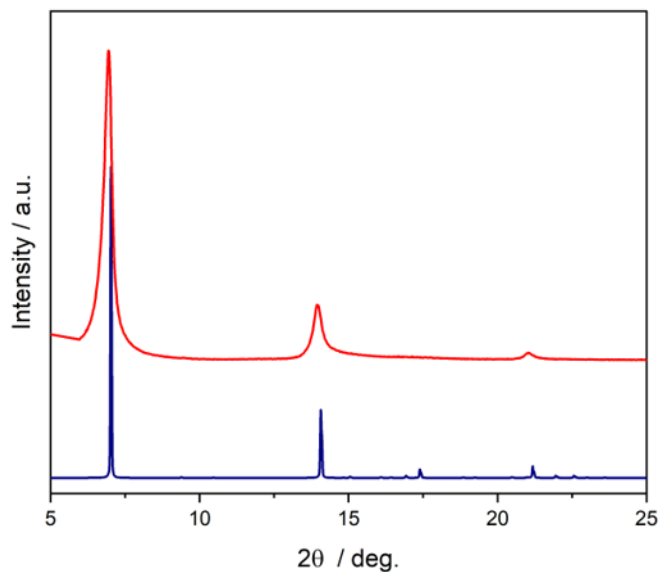

**Figure S2** PXRD pattern recorded on the powdered DUT-4(Al) (red line). A simulated PXRD of the DUT-4(Al) structure is given for reference (blue line).

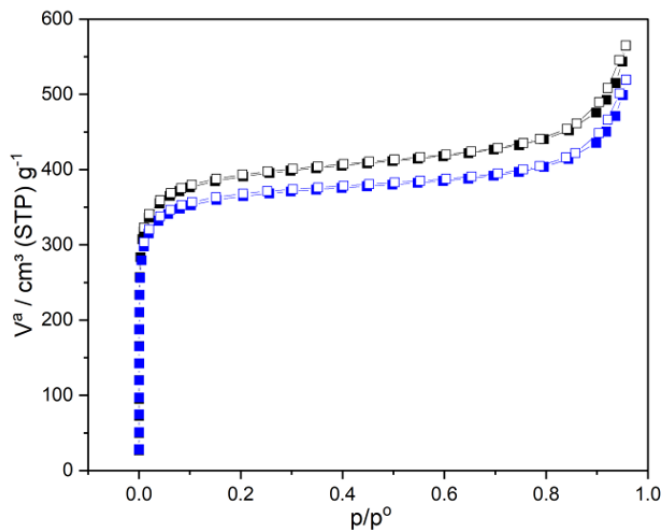

**Figure S3** N<sub>2</sub> sorption isotherm collected at 77K on the powdered DUT-4(Al) before (black line) and after (blue line)  $\alpha$ -pinene sorption experiments. Adsorption and desorption branches are evidenced by the filled and empty symbols, respectively.

## 2.2 MIL-100(Fe)

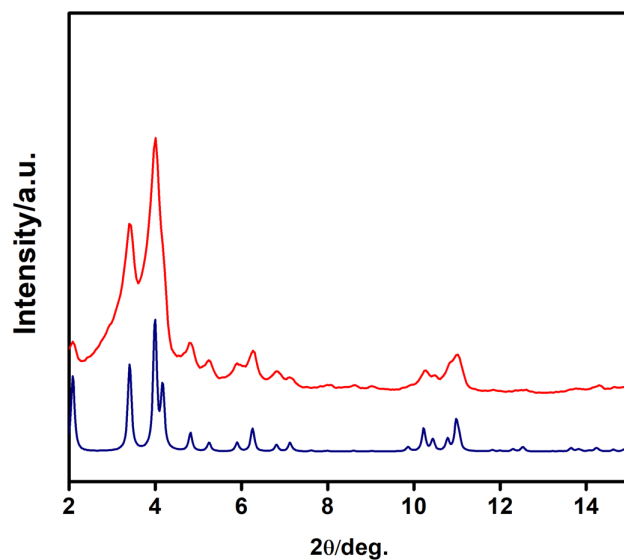

**Figure S4** PXRD pattern recorded on the powdered MIL-100(Fe) (red line). A simulated PXRD of the MIL-100(Fe) structure is given for reference (blue line).

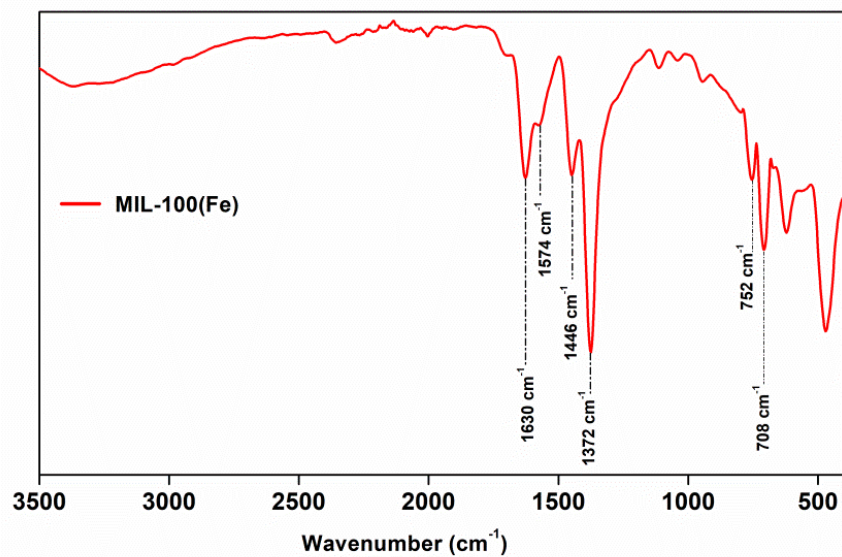

**Figure S5** FT-IR spectrum of MIL-100(Fe).

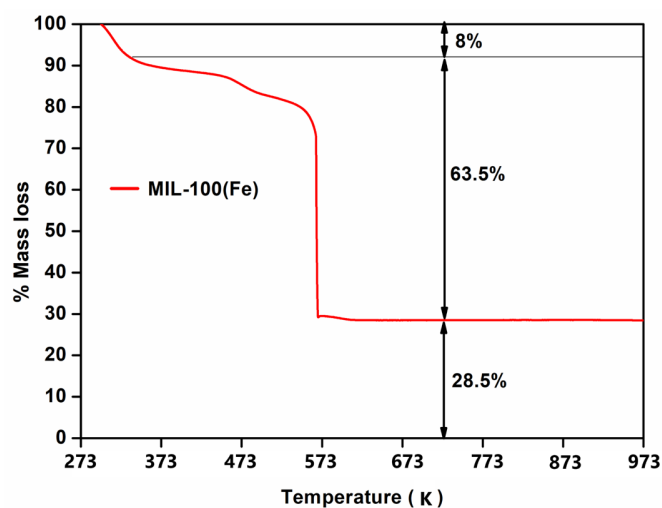

**Figure S6** Thermogravimetric analysis of MIL-100(Fe).

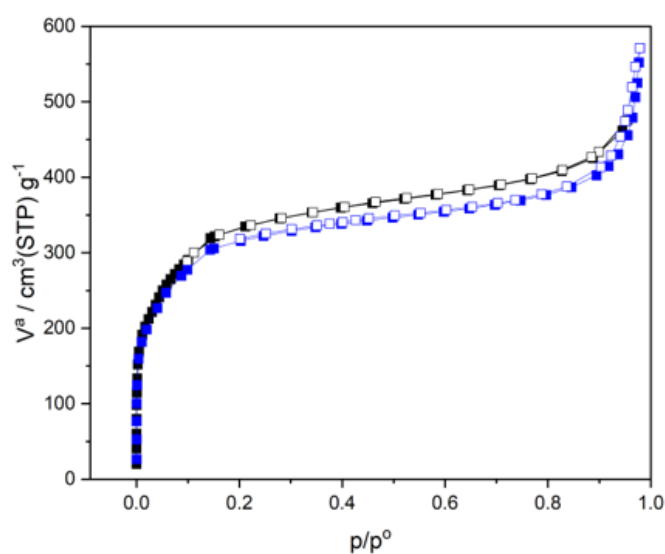

**Figure S7** N<sub>2</sub> sorption isotherm collected at 77K on the powdered MIL-100(Fe) before (black line) and after (blue line)  $\alpha$ -pinene sorption experiments. Adsorption and desorption branches are evidenced by the filled and empty symbols, respectively.

**Table S1** Textural properties of DUT-4(Al) and MIL-100(Fe) deduced from N<sub>2</sub> sorption experiments.

| MOF Structures           | S <sub>BET</sub> / m <sup>2</sup> g <sup>-1</sup> |                                 | V <sub>pore</sub> / cm <sup>3</sup> g <sup>-1</sup> |                                 |
|--------------------------|---------------------------------------------------|---------------------------------|-----------------------------------------------------|---------------------------------|
|                          | Before $\alpha$ -pinene sorption                  | After $\alpha$ -pinene sorption | Before $\alpha$ -pinene sorption                    | After $\alpha$ -pinene sorption |
| DUT-4(Al) <sup>a</sup>   | 1198                                              | 1115                            | 0.63                                                | 0.58                            |
| MIL-100(Fe) <sup>a</sup> | 1223                                              | 1194                            | 0.56                                                | 0.53                            |

<sup>a</sup>Samples were activated at 423 K for 8 hr

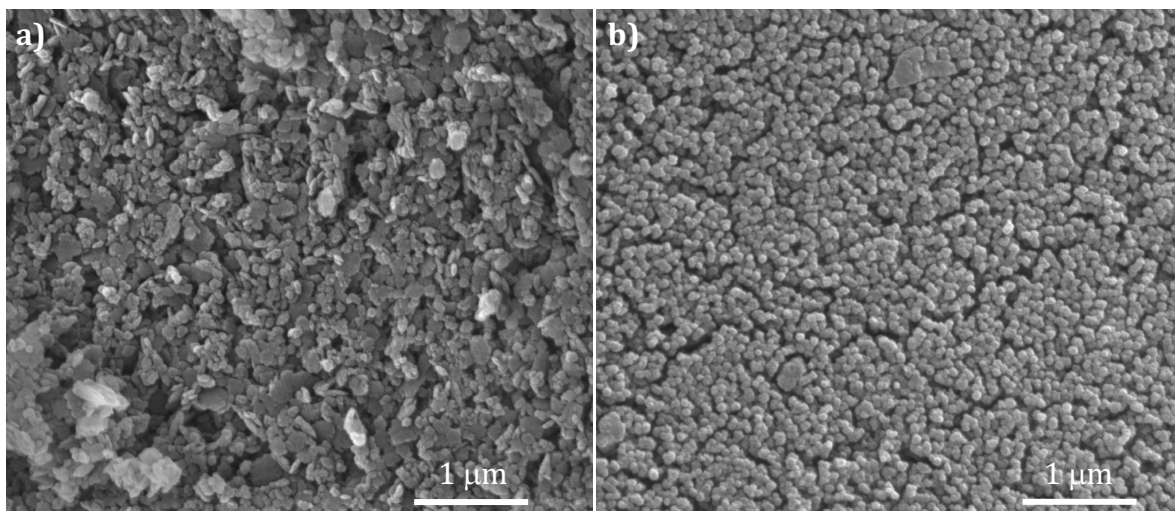

**Figure S8** SEM images of the powdered **a)** DUT-4(Al) and **b)** MIL-100(Fe). They evidence the small size of the agglomerates of DUT-4(Al) and MIL-100(Fe), consistent with DLS analysis (Figure S9).

### 3 Characterization of DUT-4(Al) and MIL-100(Fe) ethanolic suspensions

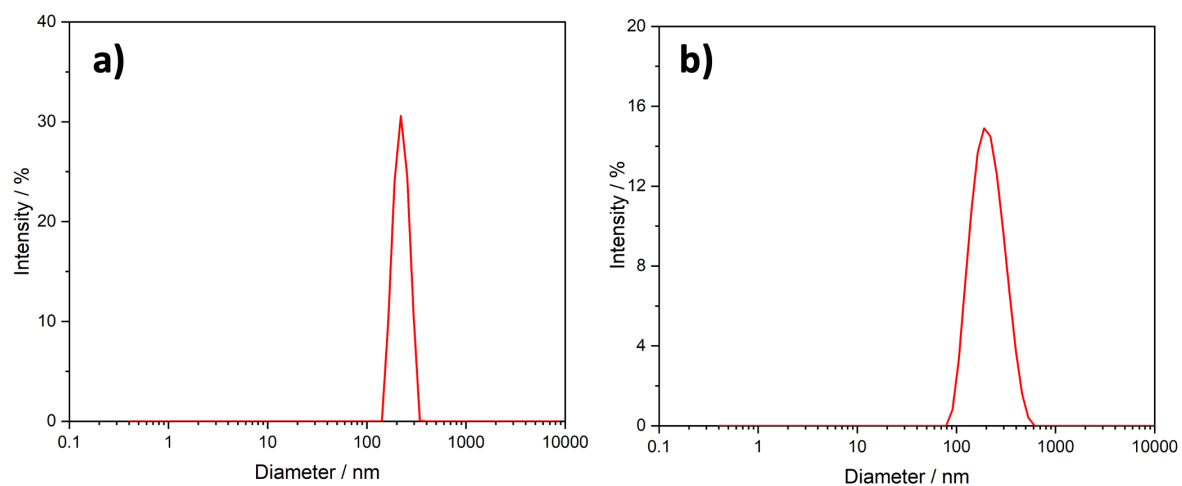

**Figure S9** Dynamic light scattering curve for the **a)** DUT-4(Al) colloidal suspension ( $7.0 \text{ g}\cdot\text{L}^{-1}$ ) and **b)** MIL-100(Fe) colloidal suspension ( $11.5 \text{ g}\cdot\text{L}^{-1}$ ) in absolute ethanol. The average hydrodynamic diameter is around 200 nm for both suspensions.

## 4 Characterization of MOF@QCM

### 4.1 DUT-4(Al)@QCM

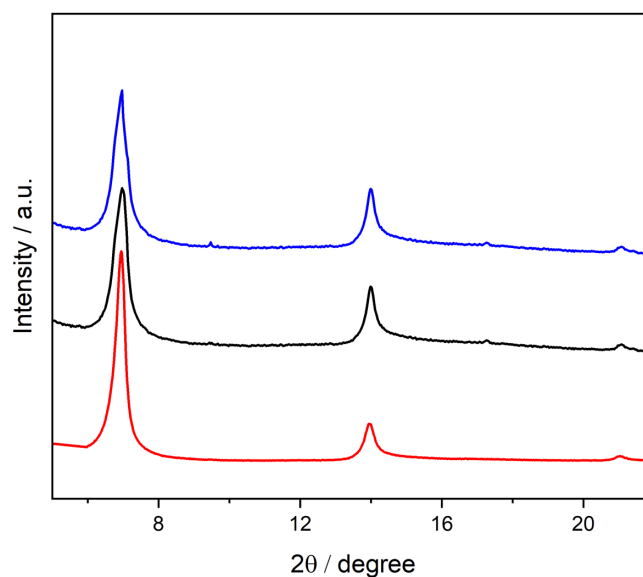

**Figure S10** PXRD pattern recorded on DUT-4(Al)@QCM film as-deposited (black line) and after  $\alpha$ -pinene sorption experiments (blue line). PXRD pattern of the powdered DUT-4(Al) is given for reference (red line).

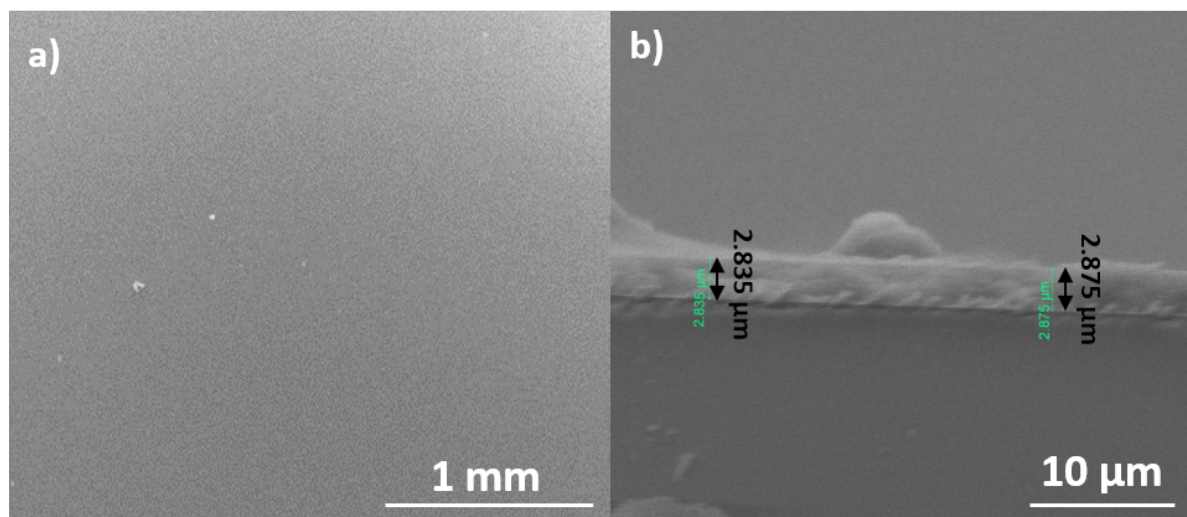

**Figure S11** SEM images of DUT-4(Al)@QCM: **a)** top and **b)** cross-sectional views. The film thickness is close to 2.85  $\mu\text{m}$ .



## 4.2 MIL-100(Fe)@QCM

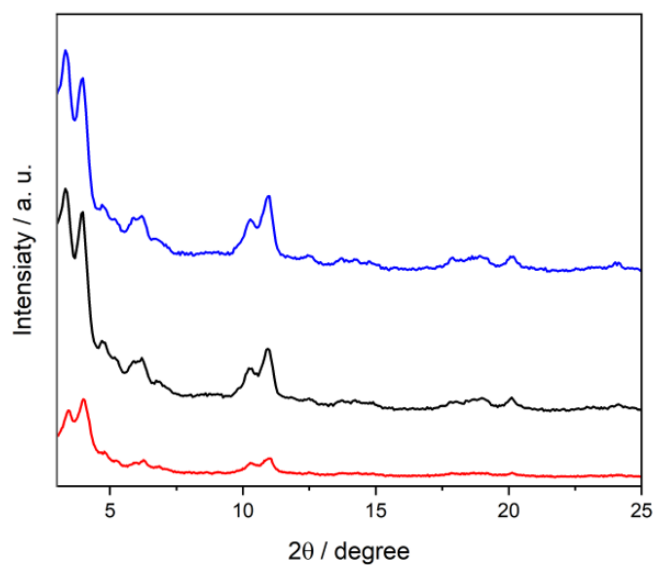

**Figure S12** PXR D pattern recorded on MIL-100(Fe)@QCM film as-deposited (black line) and after  $\alpha$ -pinene sorption experiments (blue line). PXR D pattern of the pristine powdered MIL-100(Fe) is given for reference (red line).

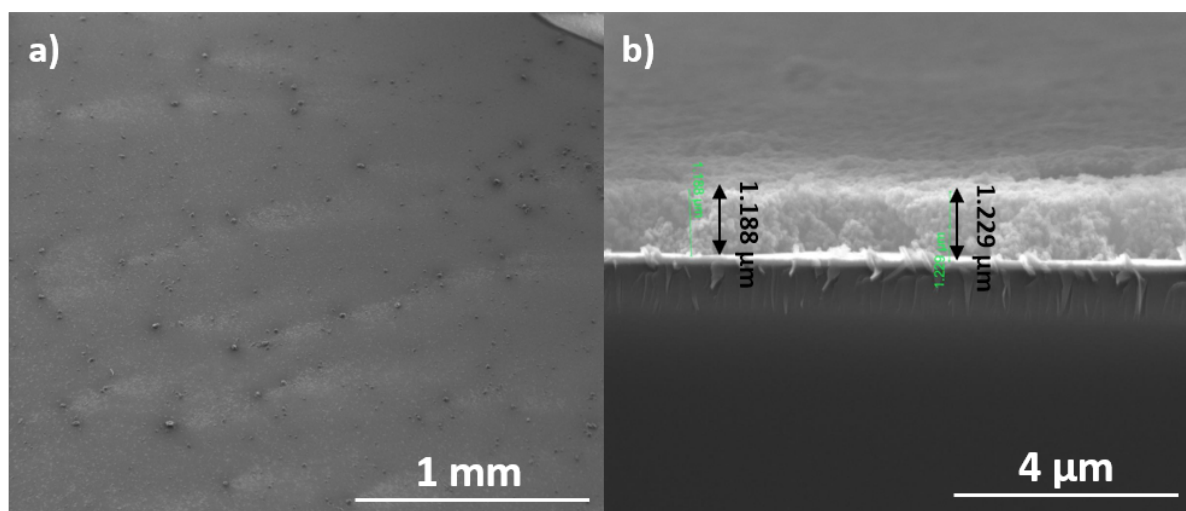

**Figure S13** SEM images of MIL-100(Fe)@QCM: **a)** top and **b)** cross-sectional views. The film thickness is close to 1.21 μm.

## 5 DUT-4(Al)@QCM and MIL-100(Fe)@QCM sensor response

### 5.1 Repeatability

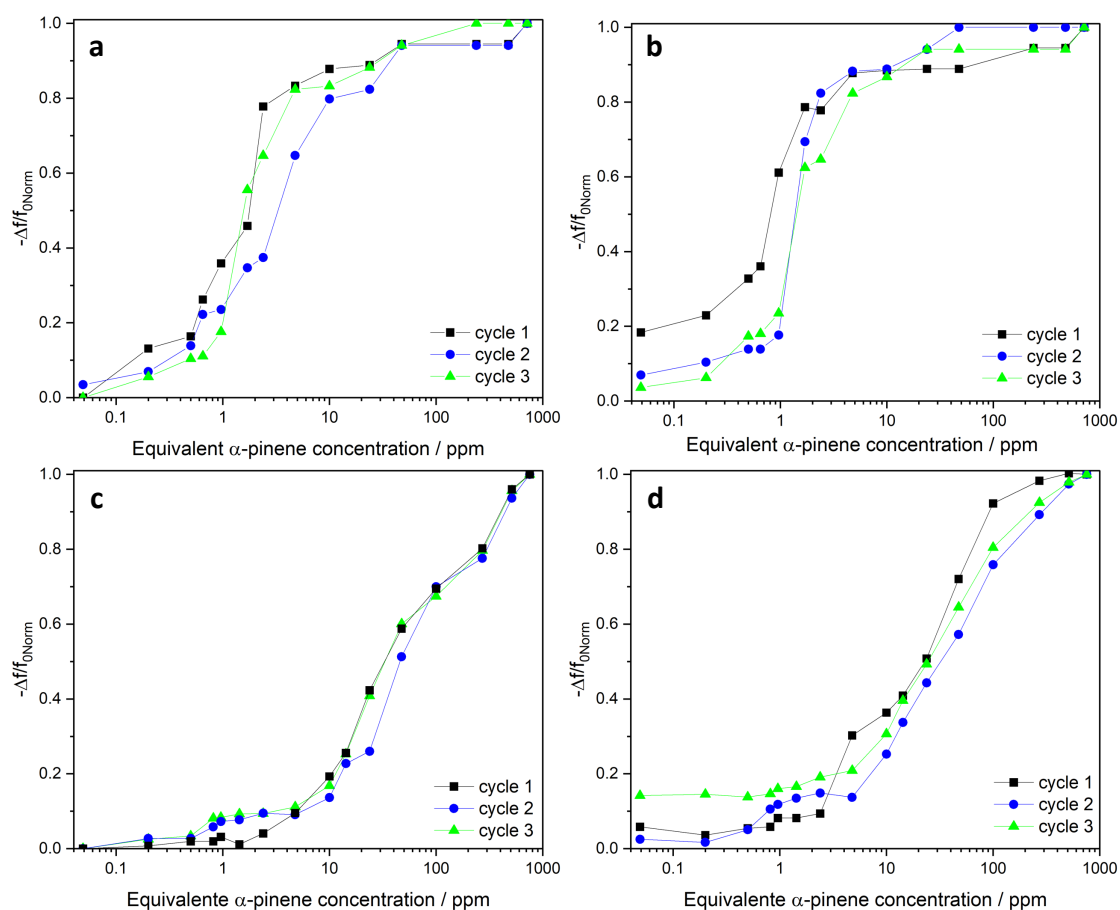

**Figure S14** Normalized relative frequency shift [ $\Delta f/f_{0\text{Norm}} = (\Delta f/f_0)/(\Delta f/f_0)_{\text{max}}$ ] for DUT-4(Al)@QCM with **a)** increasing and **b)** decreasing  $\alpha$ -pinene concentration over three sorption cycles. Normalized relative frequency shift [ $\Delta f/f_{0\text{Norm}} = (\Delta f/f_0)/(\Delta f/f_0)_{\text{max}}$ ] for MIL-100(Fe)@QCM with **a)** increasing and **b)** decreasing  $\alpha$ -pinene concentration over three sorption cycles. Lines are guide for the eyes.

### 5.2 Recovery time

**Table S2** Recovery time for DUT-4(Al)@QCM and MIL-100(Fe)@QCM, as defined by the time to achieve 90 % total change of frequency shift to reach the baseline for  $\alpha$ -pinene concentration switch back to 2 ppm.

| QCM         | Recovery time / s |                 |                 |
|-------------|-------------------|-----------------|-----------------|
|             | 5 ppm to 2 ppm    | 24 ppm to 2 ppm | 47 ppm to 2 ppm |
| DUT-4(Al)   | 28                | 24              | 20<br>70        |
| MIL-100(Fe) | 54                | 51              |                 |

### 5.3 Sensitivity

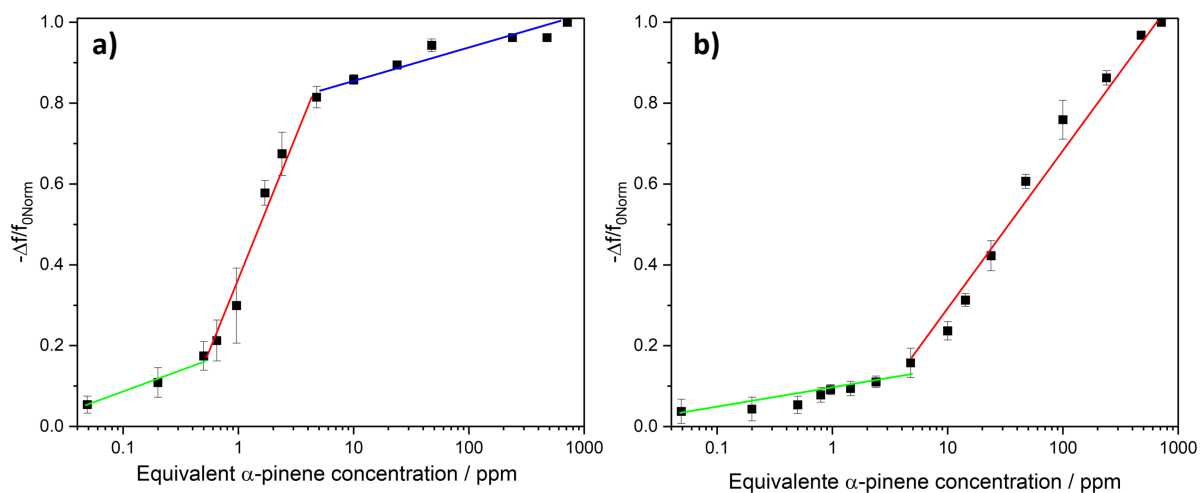

**Figure S15** Normalized relative frequency shift for **a)** DUT-4(Al)@QCM and **b)** MIL-100(Fe)@QCM *versus* the equivalent  $\alpha$ -pinene concentration. For the sake of visibility, each point corresponds to the average of the data collected with increasing and decreasing  $\alpha$ -pinene concentration and error bars represent 3 standard deviations. Linear regressions were considered to evaluate the sensitivity,  $S$ , of both sensors with respect to the equivalent  $\alpha$ -pinene concentration.

**Table S3** Sensitivity of DUT-4(Al)@QCM and MIL-100(Fe)@QCM according to the equivalent  $\alpha$ -pinene concentration

| QCM         | $\alpha$ -pinene concentration / ppm | Sensitivity in $\log_{10}(\text{ppm})^{-1}$ |
|-------------|--------------------------------------|---------------------------------------------|
| DUT-4(Al)   | 0.05 – 0.6                           | $1 \times 10^{-4}$                          |
|             | 0.6 - 4.8                            | $1 \times 10^{-3}$                          |
|             | $\geq 4.8$                           | $2 \times 10^{-4}$                          |
| MIL-100(Fe) | $\leq 4.8$                           | $7 \times 10^{-5}$                          |
|             | $\geq 4.8$                           | $5 \times 10^{-4}$                          |

## 6 Characterization of DUT-4(Al)/MIL-100(Fe)@QCM

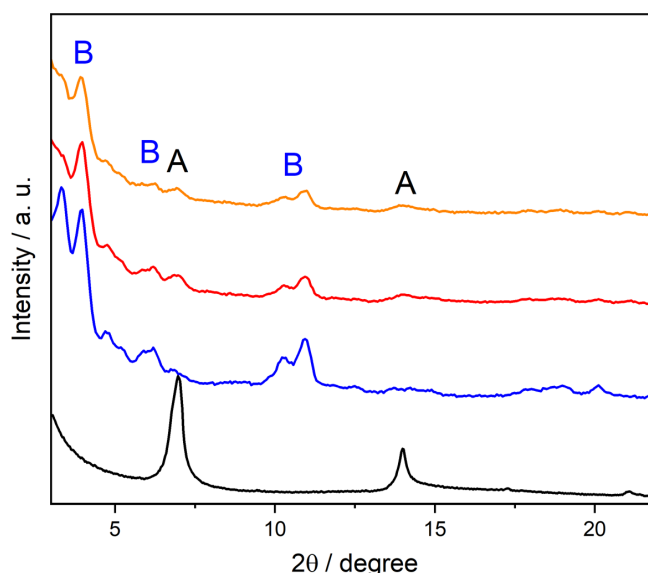

**Figure S16** PXRD pattern recorded on DUT-4(Al)/MIL-100(Fe)@QCM film as-deposited (red line) and after  $\alpha$ -pinene sorption experiments (orange line). PXRD patterns of DUT-4(Al)@QCM (black line) and MIL-100(Fe)@QCM (blue line) are given for reference. The typical bragg peaks of DUT-4(Al) and MIL-100(Fe) in DUT-4(Al)/MIL-100(Fe)@QCM are highlighted by letters A and B, respectively.

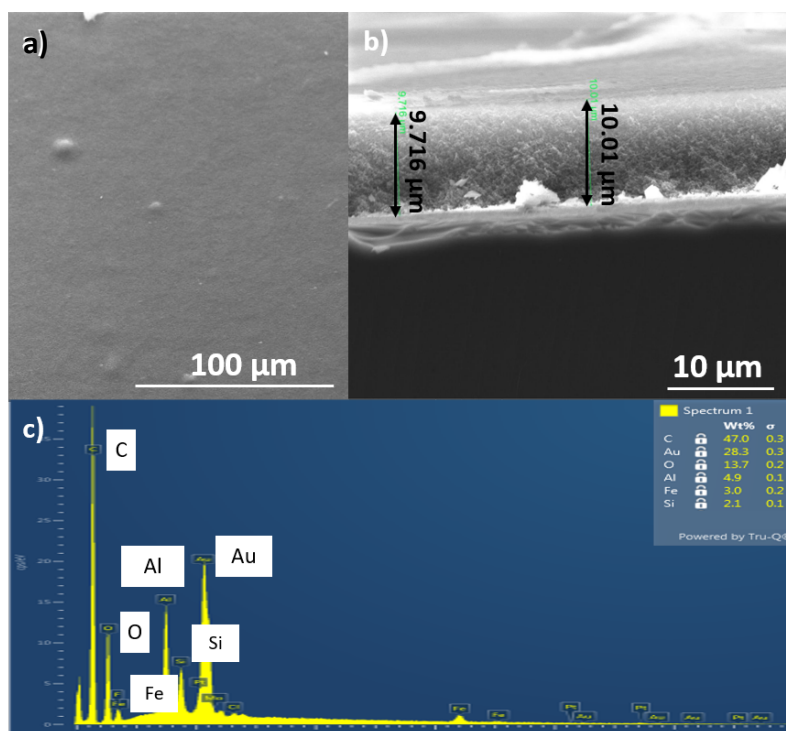

**Figure S17** SEM images of DUT-4(Al)/MIL-100(Fe)@QCM: **a)** top and **b)** cross-sectional views. Film thickness is close to 9.90 μm. **c)** EDX spectrum of DUT-4(Al)/MIL-100(Fe)@QCM.

## 7 DUT-4(Al)/MIL-100(Fe)@QCM repeatability

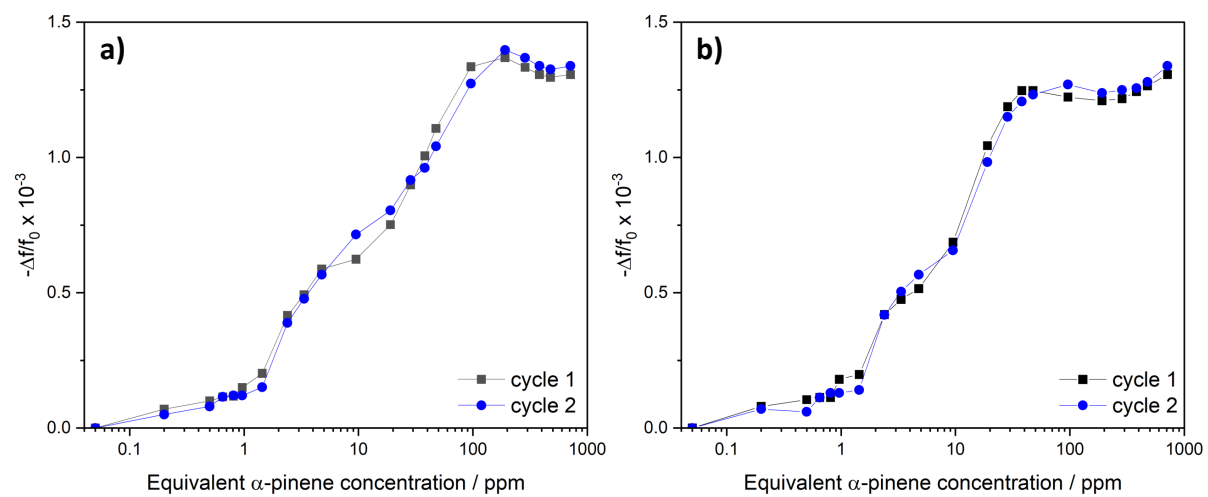

**Figure S18** Relative frequency shift for DUT-4(Al)/MIL-100(Fe)@QCM with **a)** increasing and **b)** decreasing  $\alpha$ -pinene concentration over two sorption cycles. Lines are guides for the eyes.
